# Supplementary material
Source: publisher figshare collection journal article supplement (https://frontiersin.figshare.com/ndownloader/files/14136884)
Supplement: Supplementary file [file 14136884]

**Supplementary Table S2** Total number of somatic hybrids selected on the base of vigorous growth in the fusion combinations involving potato cv. 'Delikat' (Dk) and wild type (WT) or MMR defficient *Solanum chacoense* PI 458310 (*chc*) with *Atmsh2* antisense (AS) or dominant negative (DN) gene; \* plating efficiency = number of cell colonies regenerated per 100 plated protoplasts after two weeks in culture

| <b>Fusion partners</b> | <b>Protoplast density<br/>pp/ml</b> | <b>Plating efficiency<br/>(%)*</b> | <b>Total number of plants<br/>(n)</b> |
|------------------------|-------------------------------------|------------------------------------|---------------------------------------|
| Dk + <i>chc</i> WT     | 6.2x10 <sup>4</sup>                 | 21.7                               | 13                                    |
| Dk + <i>chc</i> DN     | 6x10 <sup>4</sup>                   | 10.8                               | 67                                    |
| Dk + <i>chc</i> AS     | 6.2x10 <sup>4</sup>                 | 5.6                                | 57                                    |
